# Supplementary material
Source: publisher figshare collection journal article supplement (https://acs.figshare.com/ndownloader/files/4650907)

# Supporting Materials

## Palladium-Catalyzed Methylation of Aryl C-H Bond by Using Peroxides

Yuhua Zhang<sup>a</sup>, Jianqing Feng<sup>b</sup> and Chao-Jun Li<sup>\*a,b</sup>

<sup>a</sup> *Department of Chemistry, Tulane University, New Orleans, Louisiana 70118*

<sup>b</sup> *Department of Chemistry, McGill University, 801 Sherbrooke St. West, Montreal, Quebec H3A 2K6, Canada*

<sup>c</sup> *Email: [cj.li@mcgill.ca](mailto:cj.li@mcgill.ca)*

## *Contents*

- 1) Experimental details and characterization data for all compounds-----S-2
  
- 2) Mechanistic investigation -----S-12
  
- 3) PDF file of copies of <sup>1</sup>H NMR and <sup>13</sup>C NMR spectra for the new compounds-----S-14

## 1) Experimental details and characterization data for all new compounds

### General information:

$^1\text{H}$  NMR spectra were recorded on 400 MHz spectrometer in  $\text{CDCl}_3$  solution and the chemical shifts were reported in parts per million ( $\delta$ ) relative to internal standard TMS (0 ppm). The peak patterns are indicated as follows: s, singlet; d, doublet; t, triplet; dd, doublet of doublet; ddd, doublet of doublet of doublet; m, multiplet; q, quartet; dq, doublet of quartet. The coupling constants,  $J$ , are reported in Hertz (Hz).  $^{13}\text{C}$  NMR spectra were obtained at 100 MHz and referenced to the internal solvent signals (central peak is 77.00 ppm). MS data were obtained by Varian Saturn 2100D GC/MS Spectrometer. HRMS were made by McGill University. IR spectra were recorded by a Nexus 670 Avator FTIR Spectrometer and an ABB Bomem MB100 instrument. Flash column chromatography was performed over SORBENT silica gel 30-60  $\mu\text{m}$ . Thin layer chromatography was performed by using Sorbent Silica Gel 60  $\text{F}_{254}$  TLC plates and visualized with ultraviolet light.

Substrates **1a**, **1b**, **1c**, **1d**, **1h** and **1i** were purchased from Aldrich Corp. Other substrates **3a**, **1e**, **1f** and **1g** were prepared via Suzuki coupling of the corresponding boronic acid and 2-bromopyridine according to the literature procedure.<sup>[1]</sup> **1j** was prepared according to the literature<sup>[2]</sup>.

### General procedure:

#### *Methylation of 2-phenylpyridine with dicumyl peroxide:*

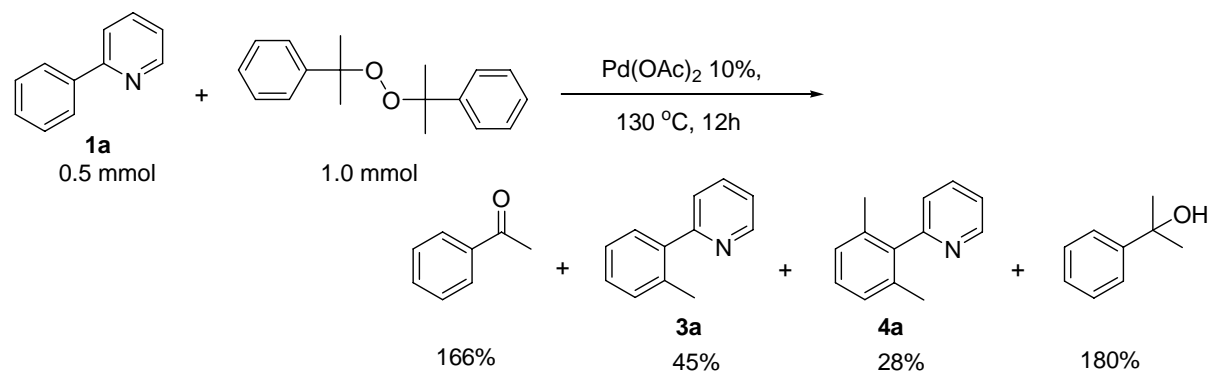

To a mixture of 2-phenylpyridine (**1a**) (79 mg, 0.5 mmol) and dicumyl peroxide (270 mg, 1.0 mmol), Pd(OAc)<sub>2</sub> (11.2 mg, 0.05 mmol) were added. Then the reaction mixture was stirred at 130°C for 12hrs under nitrogen atmosphere. After that, the resulting mixture was filtered through a short silica gel in a pipette eluting with methylene chloride. The solvent was evaporated and the residue was purified by silica gel column separation (eluted with hexane/methylene chloride = 1:2) to give acetophenone (99 mg, 166% based on 2-phenylpyridine), the desired product **3a** (35 mg, 41% based on 2-phenylpyridine), a second product **4a** (29 mg, 32% based on 2-phenylpyridine) and 2-phenylpropan-2-ol (122 mg, 180% based on 2-phenylpyridine).

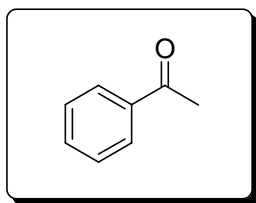

**Acetophenone.**<sup>[3]</sup> Register Number [98-86-2]. An oil; 99 mg (166% based on 2-phenylpyridine); <sup>1</sup>H NMR (400 MHz, ppm)  $\delta$  7.80-7.95(m, 2H), 7.60-7.54(m, 1H), 7.50-7.44(m, 2H), 2.61(s, 3H); <sup>13</sup>C NMR (100 MHz, ppm)  $\delta$  197.9, 136.8, 132.9, 128.3, 128.1, 26.4.

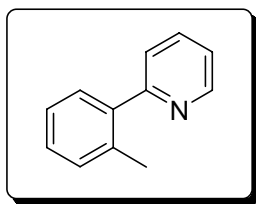

**2-o-Tolylpyridine (3a).**<sup>[4]</sup> Colorless oil; 35 mg (41% based on 2-phenylpyridine). Register Number [10273-89-9]. <sup>1</sup>H NMR (400 MHz, ppm)  $\delta$  8.71-8.69(m, 1H), 7.74(ddd,  $J$  = 7.6, 7.6, 2.0 Hz, 1H), 7.41-7.39(m, 2H), 7.31-7.22(m, 4H), 2.37(s, 3H); <sup>13</sup>C NMR (100 MHz, ppm)  $\delta$  160.2, 149.4, 140.6, 136.4, 136.0, 131.0, 129.8, 128.5, 126.1, 124.3, 121.9, 20.5.

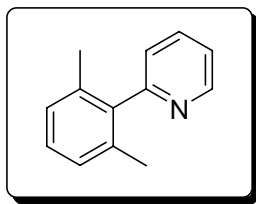

**2-(2,6-Dimethylphenyl)pyridine (4a).**<sup>[5]</sup> Colorless oil; 29 mg (32% based on 2-phenyl pyridine). Register Number [10273-91-3]. <sup>1</sup>H NMR (400 MHz, ppm)  $\delta$  8.66-8.62(m, 1H), 7.68(ddd,  $J$  = 8.0, 8.0, 2.0 Hz, 1H), 7.23-7.10(m, 3H), 7.04-7.01(m, 2H), 1.97(s, 6H); <sup>13</sup>C NMR (100 MHz, ppm)  $\delta$  160.1, 149.9, 136.5, 136.0, 128.1, 127.7, 124.7, 121.9 (possibly overlapped), 20.4.

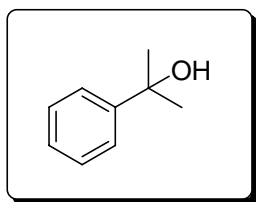

**2-Phenylpropan-2-ol.**<sup>[3]</sup> Colorless oil; 122 mg (180% based on 2-phenyl pyridine). Register Number [617-94-7]. An oil; 122 mg (180% based on 2-phenylpyridine); <sup>1</sup>H NMR (400 MHz, ppm)  $\delta$  7.52-7.48(m, 2H), 7.38-7.32(t,  $J$  = 15 Hz, 2H), 7.28-7.22(m, 1H), 1.59(s, 6H); <sup>13</sup>C NMR (100 MHz, ppm)  $\delta$  149.0, 128.0, 126.5, 124.3, 72.4, 31.6.

### ***Methylation of other substrates with dicumyl peroxide***

The characteristic data for methylation products were provided in the following. Acetophenone and 2-phenylpropan-2-ol were observed by-products in all cases; however, their yields were not determined during the separation by column.

### **Methylation of 1b with dicumyl peroxide:**

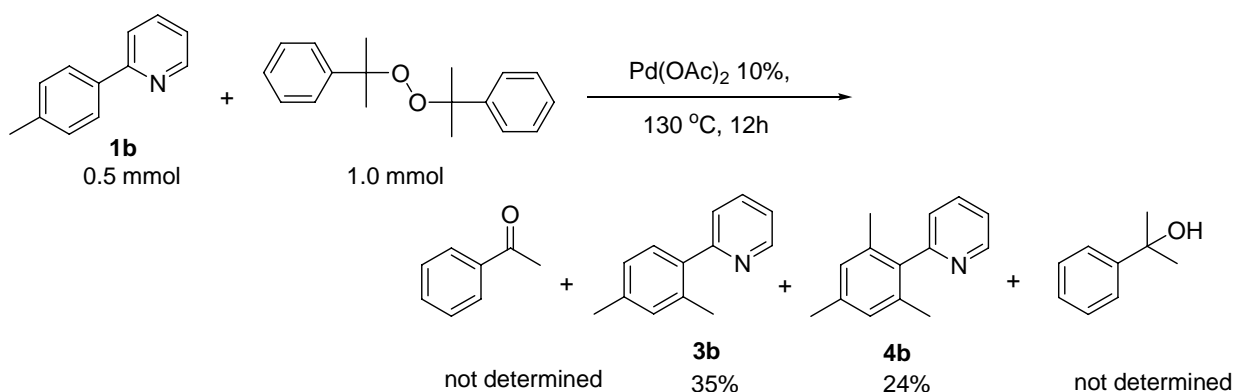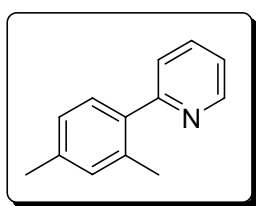

**2-(2,4-Mimethylphenyl)pyridine (3b).**<sup>[5]</sup> Following the general reaction procedure by using **1b** as the substrate, after separation by column chromatography on silica gel compound **3b** was obtained as a colorless oil (35 mg, 35% based on **1b**). . Register Number [914253-86-4].  $^1\text{H}$  NMR (400 MHz, ppm)  $\delta$  8.69-8.67(m, 1H), 7.72(ddd,  $J$  = 8.0, 8.0, 2.0 Hz, 1H), 7.38(d,  $J$  = 7.6 Hz, 1H), 7.31(d,  $J$  = 7.6 Hz, 1H), 7.23-7.20(m, 1H), 7.10-7.08(m, 2H), 2.36 (s, 3H), 2.34(s, 3H);  $^{13}\text{C}$  NMR (100 MHz, ppm)  $\delta$  160.2, 149.3, 138.2, 137.8, 136.3, 135.8, 131.7, 129.8, 126.8, 124.3, 121.6, 21.4, 20.5.

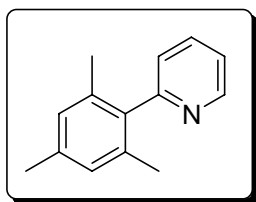

**2-Mesitylpyridine (4b).**<sup>[6]</sup> By following the general reaction procedure, **4b** was obtained from **1b** as a colorless oil (24 mg, 24% based on **1b**). Register Number [75722-64-4].  $^1\text{H}$  NMR (400 MHz, ppm)  $\delta$  8.72-8.70(m, 1H), 7.74(ddd,  $J$  = 8.0, 8.0, 2.0 Hz, 1H), 7.26-7.21(m, 2H), 6.93 (s, 2H), 2.32 (s, 3H), 2.01(s, 6H);  $^{13}\text{C}$  NMR (100 MHz, ppm)  $\delta$  160.2, 149.8, 137.9, 137.6, 136.4, 135.9, 128.5, 124.9, 121.7, 21.3, 20.3.

### Methylation of **1c** with dicumyl peroxide:

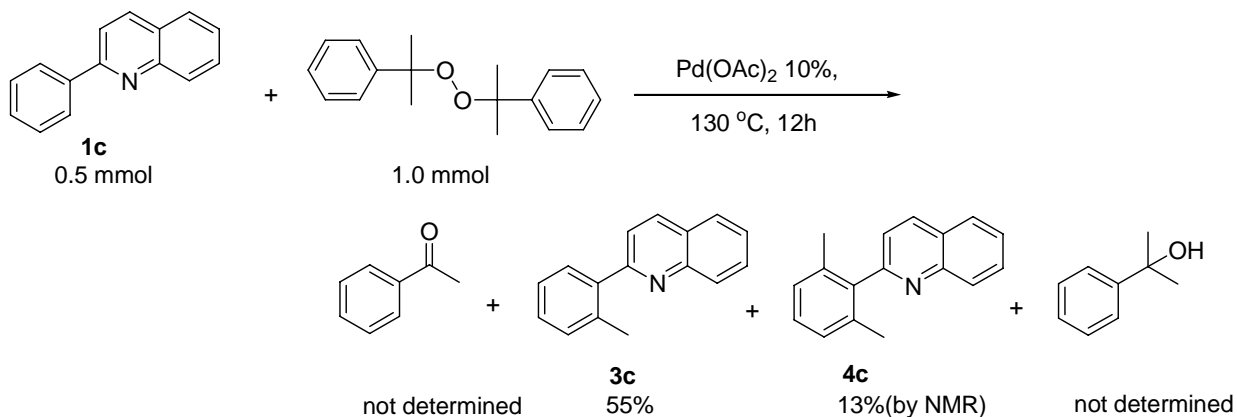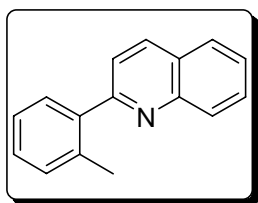

**2-*o*-Tolylquinoline (3c).**<sup>[7]</sup> By following the general reaction procedure, **3c** was obtained from **1c** as a viscous oil (60 mg, 55% based on **1c**). Register Number [52146-06-2].  $^1\text{H}$  NMR (400 MHz, ppm)  $\delta$  8.21(d,  $J$  = 8.4 Hz, 1H), 8.17(d,  $J$  = 8.4 Hz, 1H), 7.86(d,  $J$  = 8.4 Hz, 1H), 7.74(ddd,  $J$  = 7.6, 7.6, 1.2 Hz, 1H), 7.58-7.49(m, 3H), 7.37-7.30(m, 3H), 2.42(s, 3H);  $^{13}\text{C}$  NMR (100 MHz, ppm)  $\delta$  160.5, 148.1, 140.9, 136.3, 136.2, 131.1, 129.9(two peaks), 129.8, 128.8, 127.7, 127.0, 126.7, 126.3, 122.6, 20.6.

### Methylation of **1d** with dicumyl peroxide:

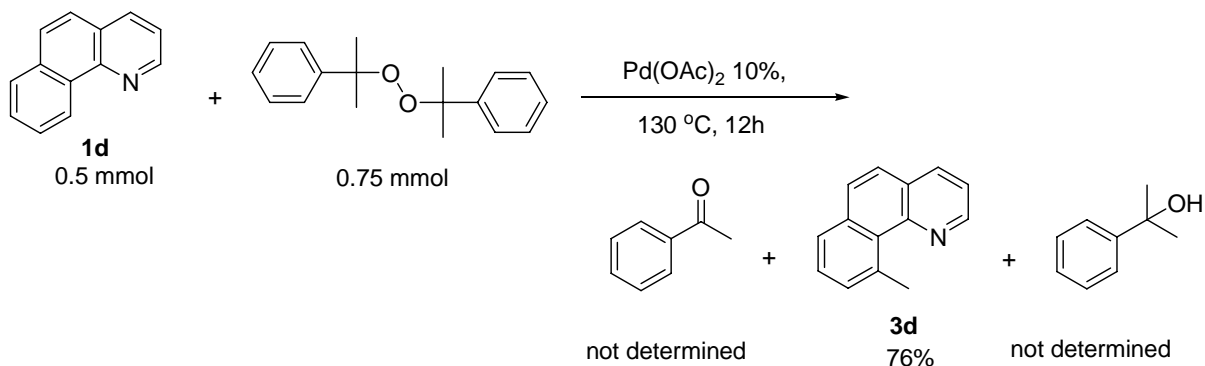

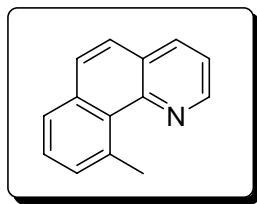

**10-Methylbenzo[h]quinoline (3d).**<sup>[5]</sup> By following the general reaction procedure except that 0.75 mmol of dicumyl peroxide was used, compound **3d** was obtained as a white solid from **1d** (73 mg, 76% based on **1d**). Register Number [914253-93-3]. <sup>1</sup>H NMR (400 MHz, ppm)  $\delta$  9.01(dd,  $J$  = 4.8, 2.0 Hz, 1H), 8.11(dd,  $J$  = 8.0, 2.0 Hz, 1H), 7.77-7.75(m, 2H), 7.61(d,  $J$  = 8.4 Hz, 1H), 7.57-7.52(m, 2H), 7.44(dd,  $J$  = 8.0, 4.4 Hz, 1H), 3.35(s, 3H); <sup>13</sup>C NMR (100 MHz, ppm)  $\delta$  149.2, 147.4, 139.0, 135.5, 135.4, 131.4, 130.1, 129.0, 127.7, 127.5, 127.0, 125.7, 120.8, 27.5.

**Methylation of 1e with dicumyl peroxide:**

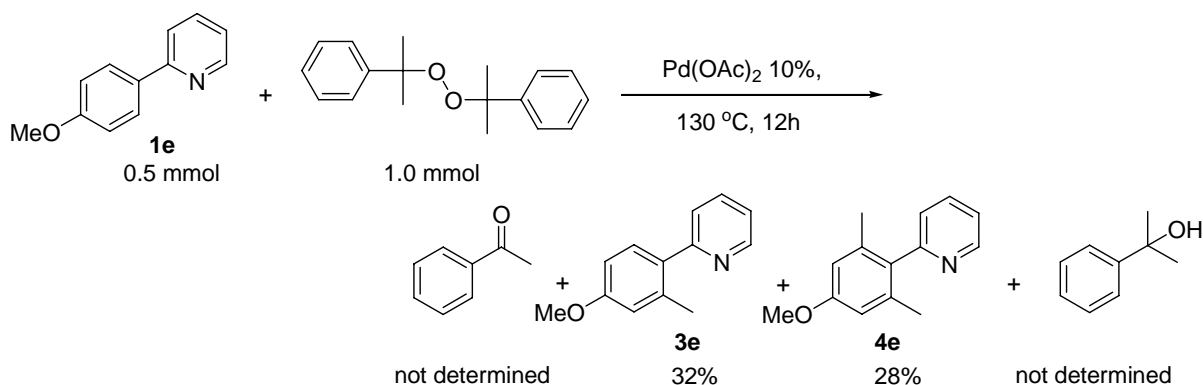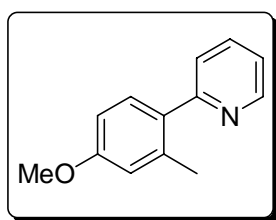

**2-(4-Methoxy-2-methylphenyl)pyridine (3e).**<sup>[4]</sup> By following the general reaction procedure, **3e** was obtained from **1e** as a colorless oil (32 mg, 32% based on **1e**). Register Number [521958-77-0]. <sup>1</sup>H NMR (400 MHz, ppm)  $\delta$  8.68-8.66(m, 1H), 7.71(ddd,  $J$  = 7.6, 7.6, 2.0 Hz, 1H), 7.38-7.35(m, 2H), 7.22-7.19(m, 1H), 6.83-6.81(m, 2H), 3.83(s, 3H), 2.37(s, 3H); <sup>13</sup>C NMR (100 MHz, ppm)  $\delta$  159.9, 159.7, 149.3, 137.6, 136.3, 133.4, 131.2, 124.3, 121.5, 116.3, 111.5, 55.5, 20.9.

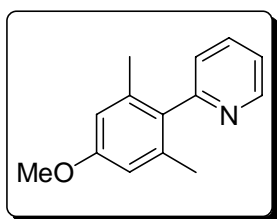

**2-(4-Methoxy-2,6-dimethylphenyl)pyridine (4e).** By following the general reaction procedure, **4e** was obtained from **1e** as a colorless oil (30 mg, 28% based on **1e**). IR(liquid): 3047, 3000, 2954, 2922, 2837, 1607, 1586, 1563, 1465, 1424, 1376, 1318, 1283, 1193, 1156, 1075, 1021, 935, 855, 794, 752  $\text{cm}^{-1}$ ;  $^1\text{H}$  NMR (400 MHz, ppm)  $\delta$  8.69-8.68(m, 1H), 7.74-7.69(m, 1H), 7.25-7.18(m, 2H), 6.64(s, 2H), 3.79(s, 3H), 2.02(s, 6H);  $^{13}\text{C}$  NMR (100 MHz, ppm)  $\delta$  160.0, 159.1, 149.8, 137.6, 136.4, 133.6, 125.3, 121.7, 113.1, 55.4, 20.7; MS (EI)  $m/z$  (%) 212(100), 197, 181, 168, 154, 141. HRMS calcd for  $\text{C}_{14}\text{H}_{15}\text{ON}$ : 213.1154; found: 213.1139.

#### Methylation of **1f** with dicumyl peroxide:

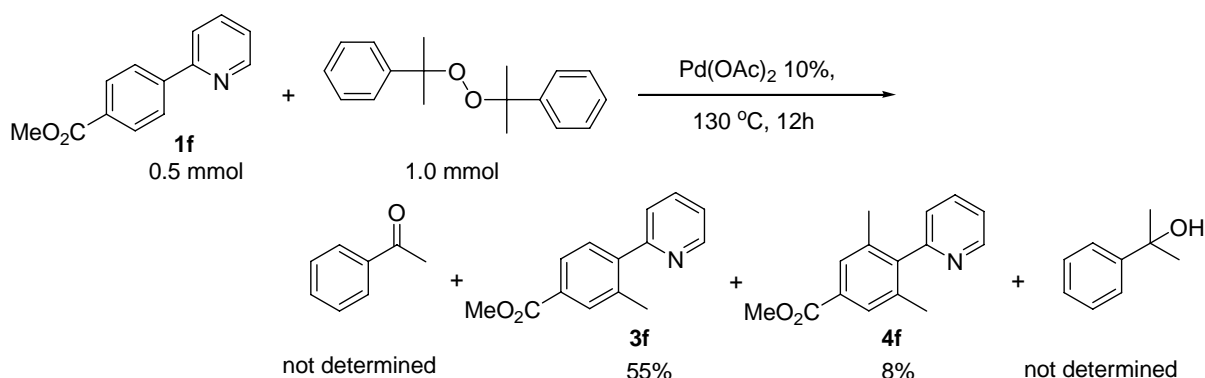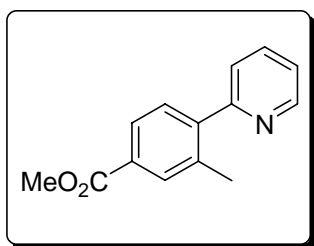



**2-(4-Methoxycarbonyl-2-methylphenyl)pyridine (3f).** By following the general reaction procedure, **3f** was obtained from **1f** as a colorless oil (62 mg, 55% based on **1f**). IR (KBr pellet):  $\nu_{\max}$  2952, 1720, 1586, 1468, 1290, 1251, 1198, 1112, 764  $\text{cm}^{-1}$ ;  $^1\text{H}$  NMR (400 MHz, ppm)  $\delta$  8.70-8.69(dd,  $J = 5.2, 0.8$  Hz, 1H), 7.96(s, 1H), 7.93(d,  $J = 7.6$  Hz, 1H), 7.77(m, 1H), 7.46(d,  $J = 8$  Hz, 1H), 7.40(d,  $J = 7.6$  Hz, 1H), 7.28(m, 1H), 3.91(s, 3H), 2.39(s, 3H);  $^{13}\text{C}$  NMR (100 MHz, ppm)  $\delta$  167.0, 158.9, 149.3, 144.6, 136.2, 136.1, 131.8, 129.7, 129.7, 127.0, 124.0, 122.1, 52.0, 20.2; HRMS calcd for  $\text{C}_{14}\text{H}_{14}\text{NO}_2^{+1}(\text{M}+1)$ : 228.1019; found: 228.1012.

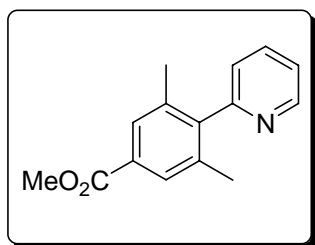

**Methyl 3,5-dimethyl-4-(pyridin-2-yl)benzoate (4f).** By following the general reaction procedure, **4f** was obtained from **1f** as a colorless oil (10 mg, 8% based on **1f**). IR (KBr pellet):  $\nu_{\max}$  2951, 1722, 1586, 1436, 1315, 1219, 1121, 771  $\text{cm}^{-1}$ ;  $^1\text{H}$  NMR (300 MHz, ppm)  $\delta$  8.70-8.69(dd,  $J = 4.2, 0.9$  Hz, 1H), 7.76(s, 2H), 7.73-7.72(m, 1H), 7.28-7.23(m, 1H), 7.19-7.16(d,  $J = 7.5$  Hz, 1H), 3.88(s, 3H), 2.04(s, 6H);  $^{13}\text{C}$  NMR (100 MHz, ppm)  $\delta$  167.1, 158.9, 149.7, 144.8, 136.4, 136.1, 129.2, 128.6, 123.9, 122.0, 51.9, 20.0. HRMS calcd for  $\text{C}_{15}\text{H}_{16}\text{NO}_2^{+1}(\text{M}+1)$ : 242.1181; found: 242.1186.

**Methylation of 1g with dicumyl peroxide:**

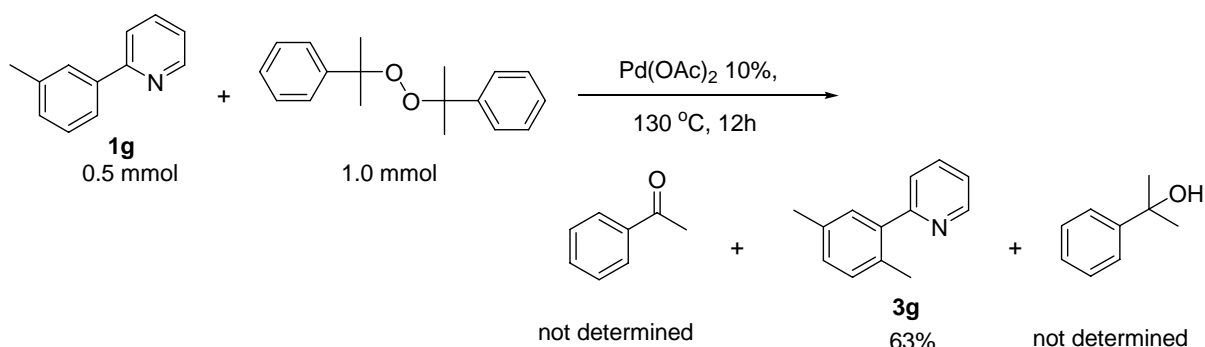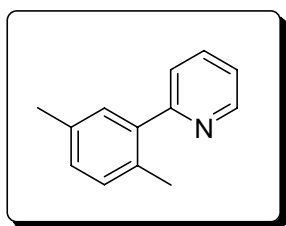

**2-(2,5-Dimethylphenyl)pyridine (3g).** By following the general reaction procedure, **3g** was obtained from **1g** as a colorless oil (58 mg, 63% based on **1g**). IR (KBr pellet):  $\nu_{\text{max}}$  2922, 1588, 1465, 1426, 793, 750  $\text{cm}^{-1}$ ;  $^1\text{H}$  NMR (400 MHz, ppm)  $\delta$  8.71(m, 1H), 7.75(dt,  $J = 8, 2$  Hz, 1H), 7.41(d,  $J = 7.6$  Hz, 1H), 7.25-7.11 (m, 4H), 2.37(s, 3H), 2.33(s, 3H);  $^{13}\text{C}$  NMR (100 MHz, ppm)  $\delta$  160.0, 149.2, 140.2, 135.9, 135.2, 132.4, 130.6, 130.2, 128.9, 124.0, 121.4, 20.8, 19.7; HRMS calcd for  $\text{C}_{13}\text{H}_{14}\text{N}^{+1}(\text{M}+1)$ : 184.1121; found: 184.1118.

#### Methylation of **1h** with dicumyl peroxide:

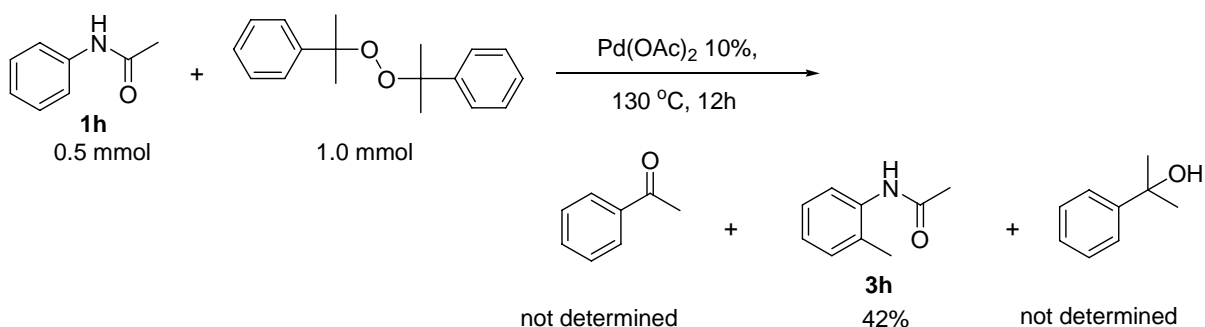

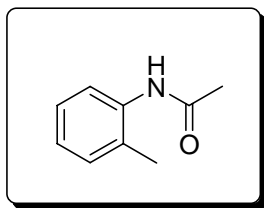

**N-o-Tolylacetamide (3h).**<sup>[8]</sup> By following the general reaction procedure, **3h** was obtained from **1h** as a pale yellow solid (31 mg, 42% based on **1h**). Register Number [120-66-1]. <sup>1</sup>H NMR (400 MHz, ppm) <sup>1</sup>H NMR (400 MHz, ppm)  $\delta$  7.68(d,  $J$  = 8.0 Hz, 1H), 7.20-7.13(m, 3H), 7.07(dd,  $J$  = 6.8, 7.6 Hz, 1H), 2.23(s, 3H), 2.17(s, 3H); <sup>13</sup>C NMR (100 MHz, ppm)  $\delta$  168.8, 135.8, 130.7, 129.9, 126.9, 125.6, 123.9, 24.4, 18.0.

**Methylation of 1i with dicumyl peroxide:**

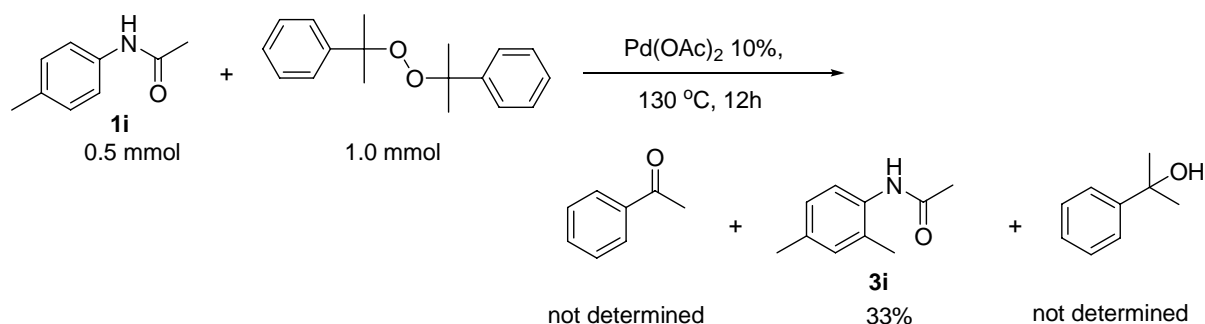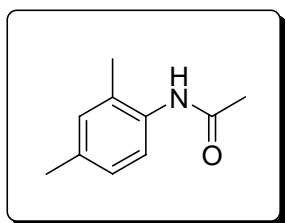

**N-(2,4-dimethylphenyl)acetamide (3i).**<sup>[9]</sup> By following the general reaction procedure, **3i** was obtained from **1i** as a pale yellow solid (27 mg, 33% based on **1i**). Register Number [2050-43-3]. <sup>1</sup>H NMR (400 MHz, ppm)  $\delta$  7.48(d,  $J$  = 8.8 Hz, 1H), 7.14(s, 1H), 7.01-6.97(m, 2H), 2.28(s, 3H), 2.19(s, 3H), 2.16(s, 3H); <sup>13</sup>C NMR (100 MHz, ppm)  $\delta$  168.9, 135.5, 133.1, 131.4, 130.5, 127.4, 124.3, 24.3, 21.1, 18.0.

## 2) Mechanistic investigation: Isotope effect

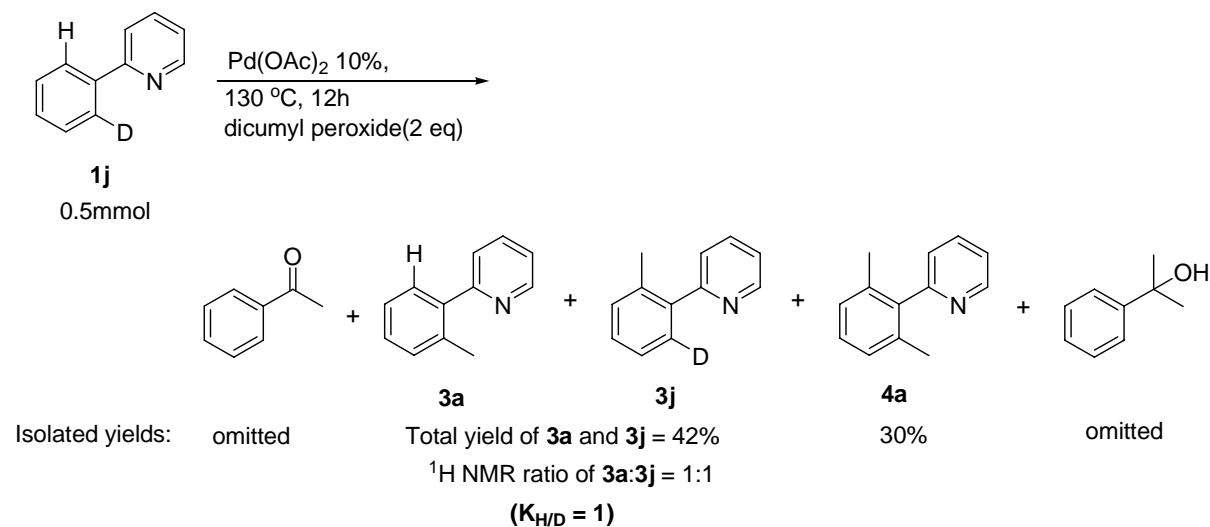

To a mixture of 2-phenyl pyridine **1j** (80 mg, 0.5 mmol) and dicumyl peroxide (270 mg, 1.0 mmol), Pd(OAc)<sub>2</sub> (11.2 mg, 0.05 mmol) were added. Then the reaction mixture was stirred at 130°C for 12hr under nitrogen atmosphere. After that, the resulting mixture was filtered through a short silica gel in a pipette eluting with methylene chloride. The solvent was evaporated and the residue was purified by silica gel column chromatography (eluting with hexane/methylene chloride = 1:2), to give acetophenone (its yield was not determined), the mono-methylated product **3a** and **3j** (overall 35 mg, 42% based on **1j**), <sup>1</sup>H NMR analysis showed that the ratio of *ortho*-proton product **3a** to *ortho*-deuterium product **3j** is 1:1 (Compared with the <sup>1</sup>H NMR spectrum of pure **3a**, the integration of the peaks at 7.40 was 1.48 instead of 2). Then the second product **4a** (28 mg, 30% based on **1j**), and 2-phenylpropan-2-ol (its yield was also omitted) were eluted successively.

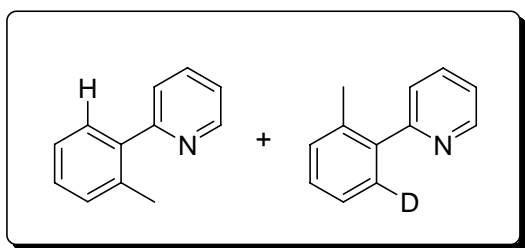

**3a** and **3j** (crude NMR ratio of **3a** and **3j** = 1:1)

Colorless oil; 35 mg (42% based on **1j**).  $^1\text{H}$  NMR (400 MHz, ppm)  $\delta$  8.71-8.69(m, 1H), 7.76-7.72(m, 1H), 7.41-7.39(m, 1.5H), 7.31-7.22(m, 4H), 2.37(s, 3H);  $^{13}\text{C}$  NMR (75 MHz, ppm)  $\delta$  160.0, 149.2, 140.3, 136.1, 135.7, 130.7, 129.6, 128.2, 125.8, 125.7, 124.1, 121.6, 20.3. MS (EI)  $m/z$  (%) 170, 169(100), 168, 167.

## References:

- [1] Littke, A. F.; Dai, C. Y.; Fu, G. C. *J. Am. Chem. Soc.* **2000**, *122*, 4020-4028.
- [2] Chen, X.; Hao, X.-S.; Goodhue, C.E.; Yu, J.-Q. *J. Am. Chem. Soc.* **2006**, *128*, 6790.
- [3] Spectral data were identical to those of the commercially available products.
- [4] So, C. M.; Lau, C. P.; Kwong, F. Y. *Org. Lett.* **2007**, *9*, 2795-2798.
- [5] Chen, X.; Goodhue, C. E. Yu, J.-Q. *J. Am. Chem. Soc.* **2006**, *128*, 12634-12635.
- [6] Korn, T. J.; Schade, M. A.; Cheemala, M. N.; Wirth, S.; Guevara, S. A.; Cahiez, G.; Knochel, P. *Synthesis* **2006**, *21*, 3547-3574.
- [7] Cho, C. S.; Kim, B. T.; Choi, H.-J.; Kim, T.-J.; Shim, S. C. *Tetrahedron* **2003**, *59*, 7997-8002.
- [8] Ramalingan, C.; Park, Y.-T. *J. Org. Chem.* **2007**, *72*, 4536-4538.
- [9] Shilpa; Gowda, B. T. *Zeitschrift fuer Naturforschung, A: Physics Sciences* **2007**, *62*, 84-90.



archive of spectra: /support/beam/11/analysis/data  
 Sample directory: y00007-04-2-00\_47003607  
 File: CARBOX

Pulse Sequence: zgpg30

Solvent: CDCl3

Acquisition Temperature: 300 K

TECHNICAL INFORMATION

NAME: y00007-04-2-00\_47003607

DATE: 04/25/04

128 REVISIONS

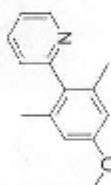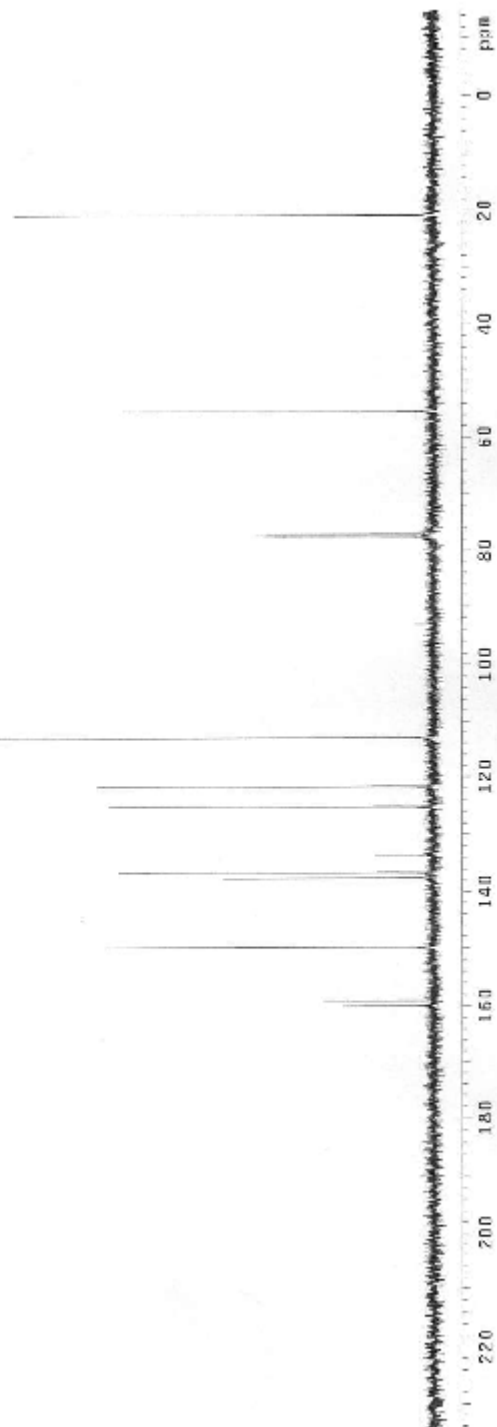

STANDARD 1H OBSERVE

Data Collected on:  
m400-mercury/400  
Archive directory:  
/export/home/pmacleod/vnmrSYS/data  
Sample directory:

File: PROTON

Pulse Sequence: szpul  
Solvent: CDCl3

Relax. delay 1.000 sec  
Pulse 45.0 degrees  
Acq. time 1.995 sec  
Width 640.3 Hz  
F2 (MHz) 400.1219604  
OBSERVE H1 400.1219604 MHz  
DATA PROCESSING  
FT size 32768  
Total time 0 min

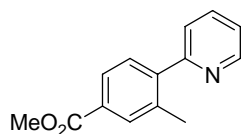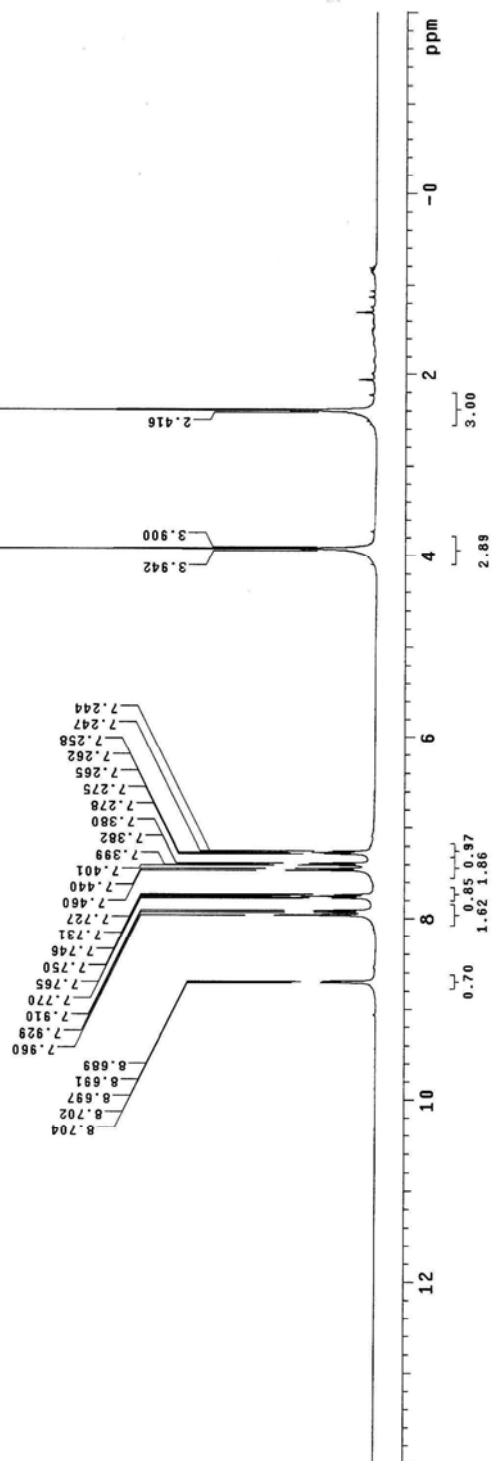



13C OBSERVE

Data Collected on:  
 Date: 01/01/2001  
 Archive directory:  
 /export/home/pnacleod/vnmrsys/data

Sample directory:

File: CARBON

Pulse Sequence: s2pul

Solvent: CDCl3

Temp. 23.6 C / 296.8 K

Relax. delay 1.000 sec

Pulse 45.0 degrees

Acq. time 1.199 sec

Width 25125.6 Hz

Observed 100.6107539 MHz

Observed 400.1239934 MHz

Decouple H1, 400.1239934 MHz

Power 35 dB

continuously on

WALTZ-16 modulated

DATA PROCESSING

Line broadening 1.0 Hz

FT size 65536

Total time 1 hr, 48 min

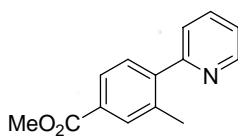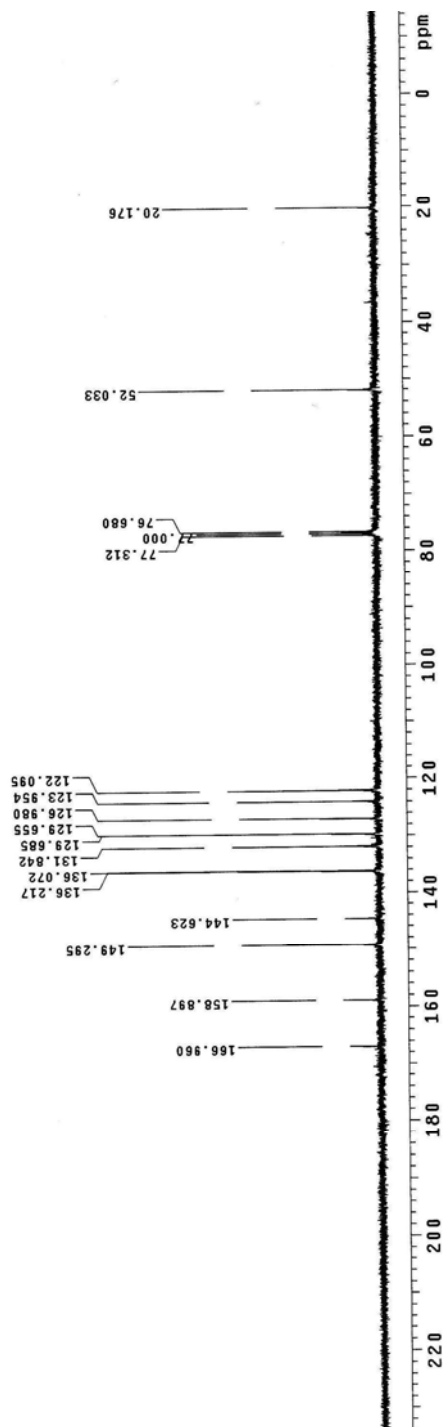

STANDARD 1H OBSERVE

Pulse Sequence: s2pul  
Solvent: CDCl3  
Ambient temperature  
Mercury-300 "m300"

Relax. delay 1.000 sec  
Pulse 58.9 degrees  
Acq. time 1.52 sec  
Width 4506.5 Hz  
4 repetitions  
OBSERVE H1, 300.0549900 MHz  
DATA PROCESSING  
FT size 32768  
Total time 0 min, 13 sec

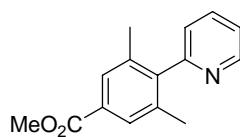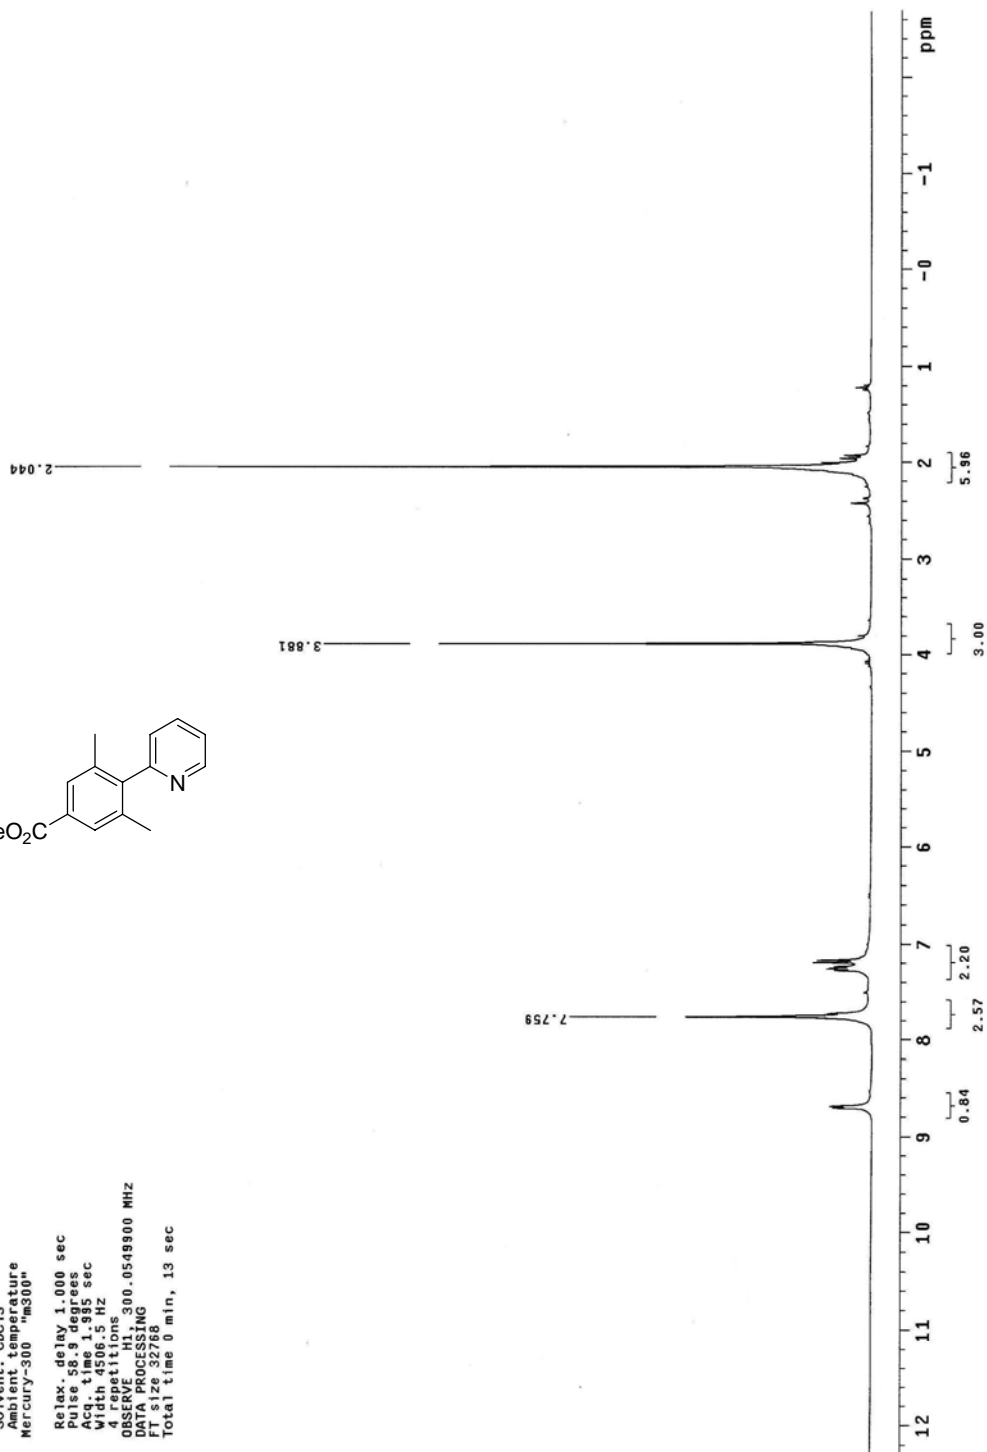

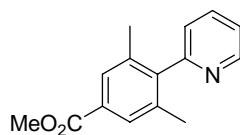

**<sup>13</sup>C OBSERVE**

Pulse Sequence: s2pul  
Solvent: CDCl<sub>3</sub>  
Ambient temperature  
Mercury-300 "m300"

Relax. delay 1.500 sec  
Pulse 58.2 degrees  
Acq. time 1.55 sec  
Width 18761.7 Hz  
160 repetitions  
OBSERVE C13, 75.4488956 MHz  
DECOUPLE H1, 300.0564325 MHz  
Power 34 dB  
Continuously on  
WALTZ-16 pulsed  
DATA PROCESSING  
Line broadening 1.0 Hz  
FT size 131072  
Total time 1 hr, 17 min, 34 sec

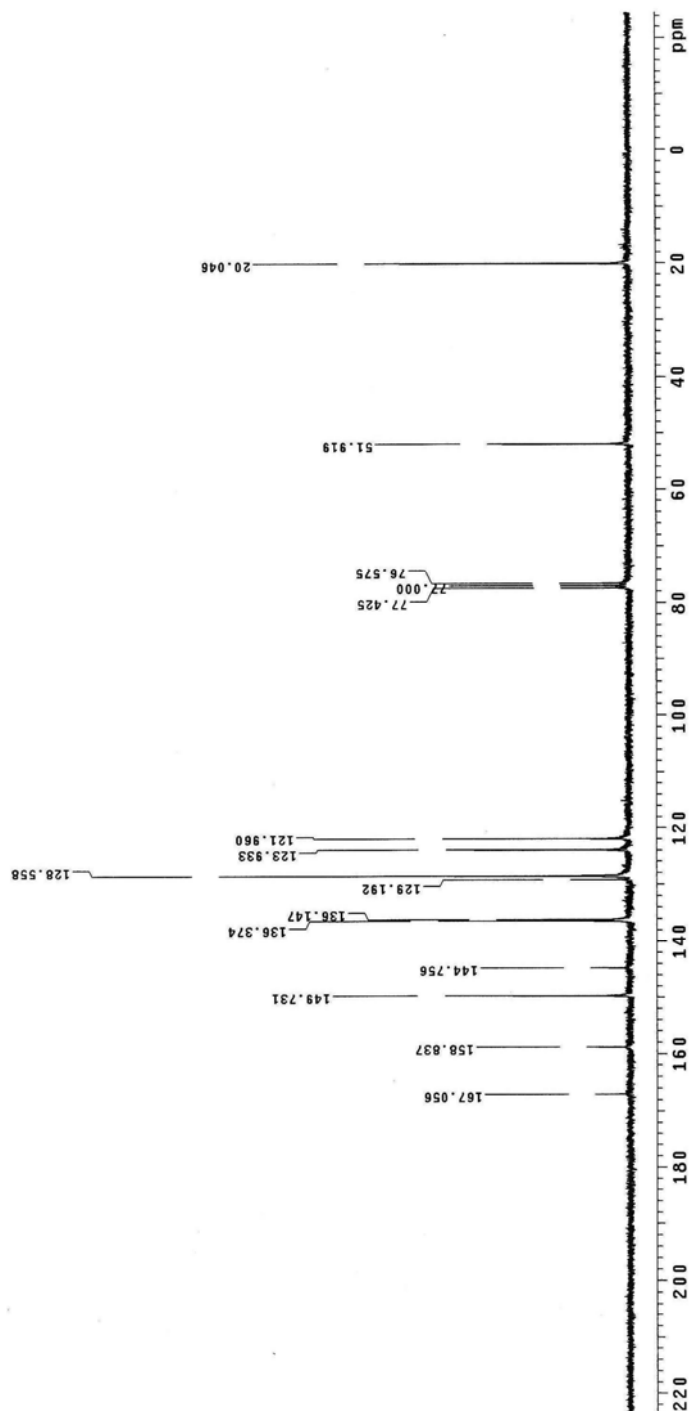

Data Collected on:  
m400-mercury400  
Archive directory:  
/export/home/pmacleod/vmrsys/data  
Sample directory:

Pulse Sequence: s2pu1  
Solvent: CDCl3

Temp. 23.0 C / 296.1 K

Compt. Rend. Acad. Sci. Paris 270: 1000-1001, 1970

Relax. delay 1.000 sec  
Pulse 45.0 degrees

Pulse 45.0 degrees  
Acq. time 1.995 sec

Width 6410.3 Hz

4 repetitions

OBSERVE H1, 400.1219604 MHZ  
DATA PROCESSINGDATA PROCESSING  
FT size 32768

Total time 0 min

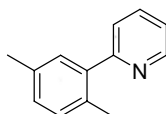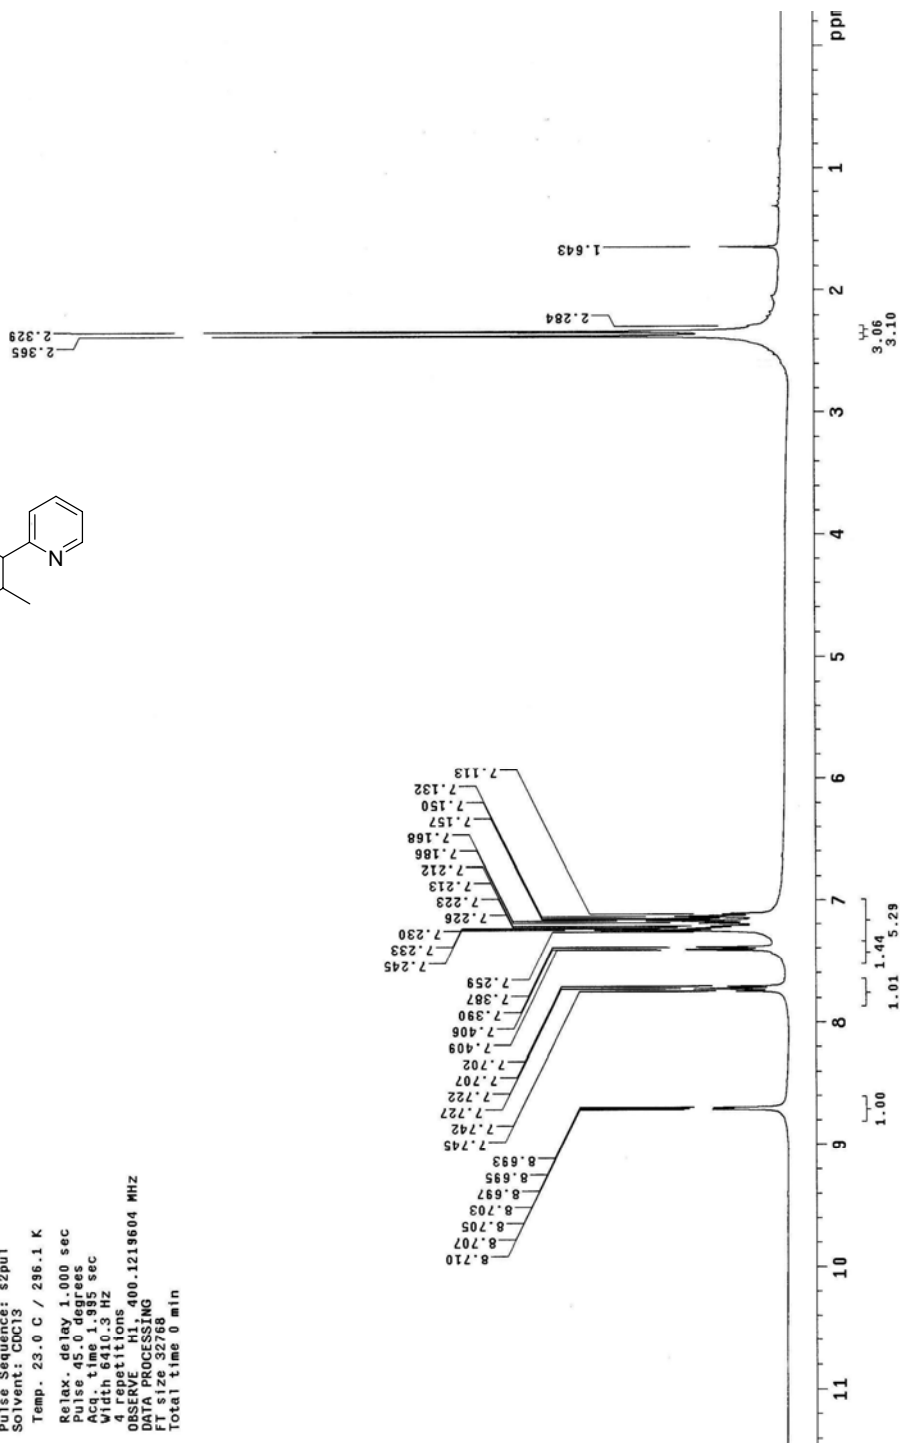

13C OBSERVE

Data Collected on:  
m400-mercury400  
Archive directory:  
/export/home/pmacleod/vnmrSYS/data  
Sample directory:

File: CARBON

Pulse Sequence: s2pu1  
Solvent: CDCl3  
Temp.: 23.5 C / 296.6 K  
Relax. delay 1.000 sec  
Pulse delay 0.000 sec  
Acq. time 1.159 sec  
Width 25125.6 Hz  
1160 repetitions  
OBSERVE C13, 100.6107554 MHz  
DECOUPLE H1, 400.1239934 MHz  
Power 35 dB  
Continuous on  
WALTZ-16  
DATA PROCESSING  
Line broadening 1.0 Hz  
FI size 65536  
Total time 9 hr

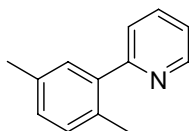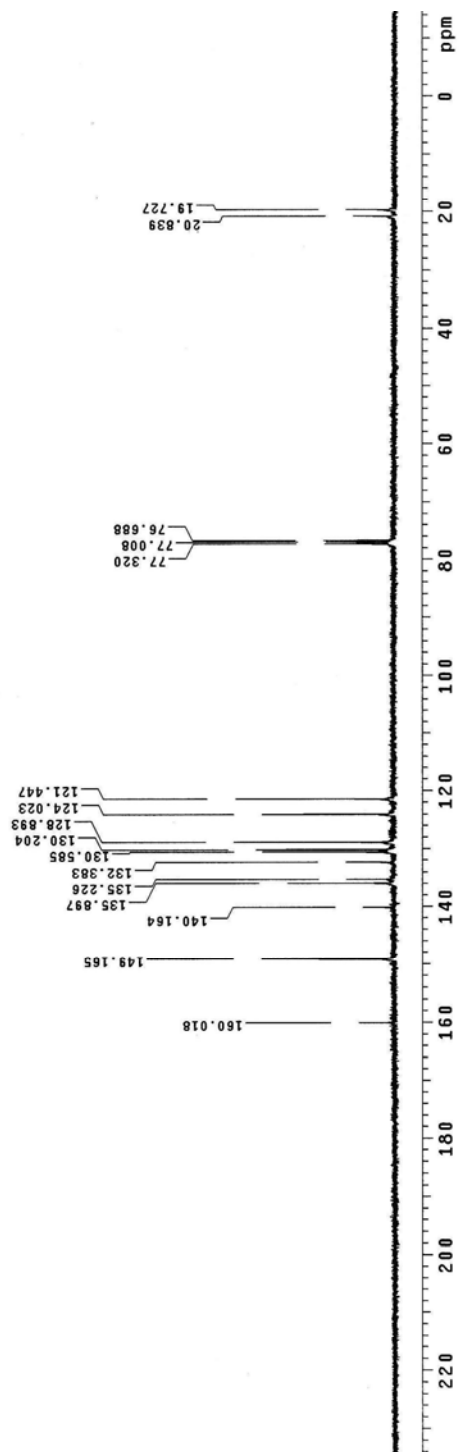

STANDARD 1H OBSERVE

Pulse Sequence: s2pul1  
 Solvent: CDCl3  
 Acquisition temperature  
 Mercury-300 400 MHz  
 Relax. delay 1.000 sec  
 Pulse 58.3 degrees  
 Acq. time 1.995 sec  
 Width 4506.5 Hz  
 # repetitions 200.0549900 MHz  
 OBSERVE  
 DATA PROCESSING  
 FT size 32768  
 Total time 0 min, 13 sec

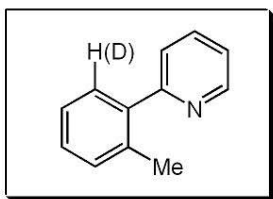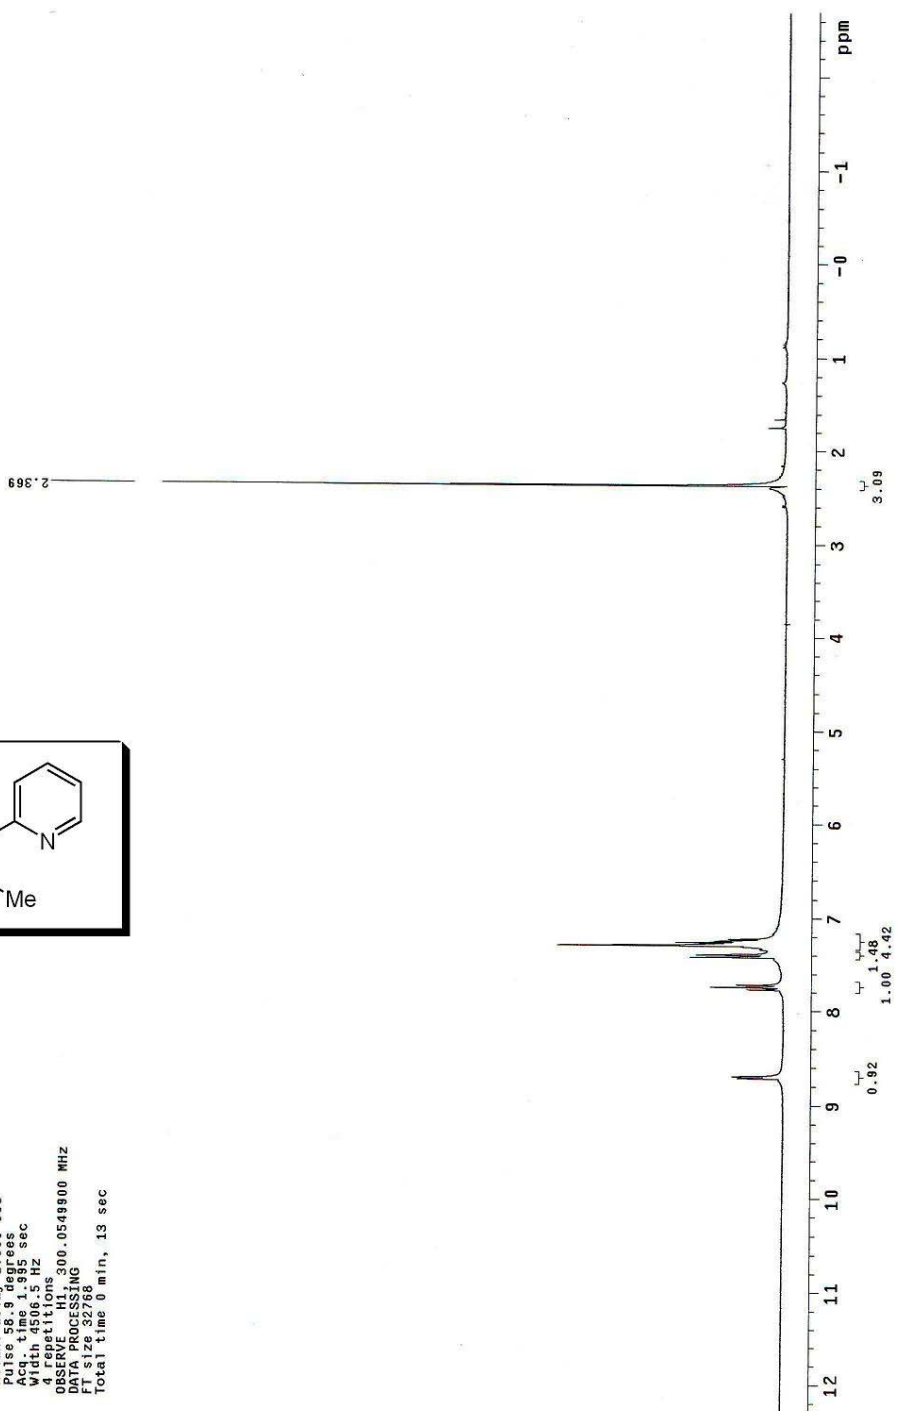

**13C OBSERVE**

Pulse Sequence: s2pu1  
 Solvent: CDCl3  
 Ambient temperature  
 Mercury-300 "m300"  
 Relax. delay 1.500 sec  
 Pulse 58.2 degrees  
 Acq. time 1.815 sec  
 Width 18761.7 Hz  
 984.966 kHz  
 OBSERVE C13, 300.0584325 MHz  
 DECOUPLE H1, 300.0584325 MHz  
 Power 34 dB  
 continuously on  
 Modulated  
 Data processing  
 Line broadening 1.0 Hz  
 FT size 131072  
 Total time 13 hr, 31 min, 10 sec

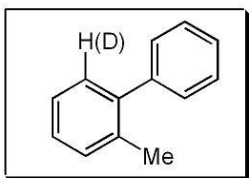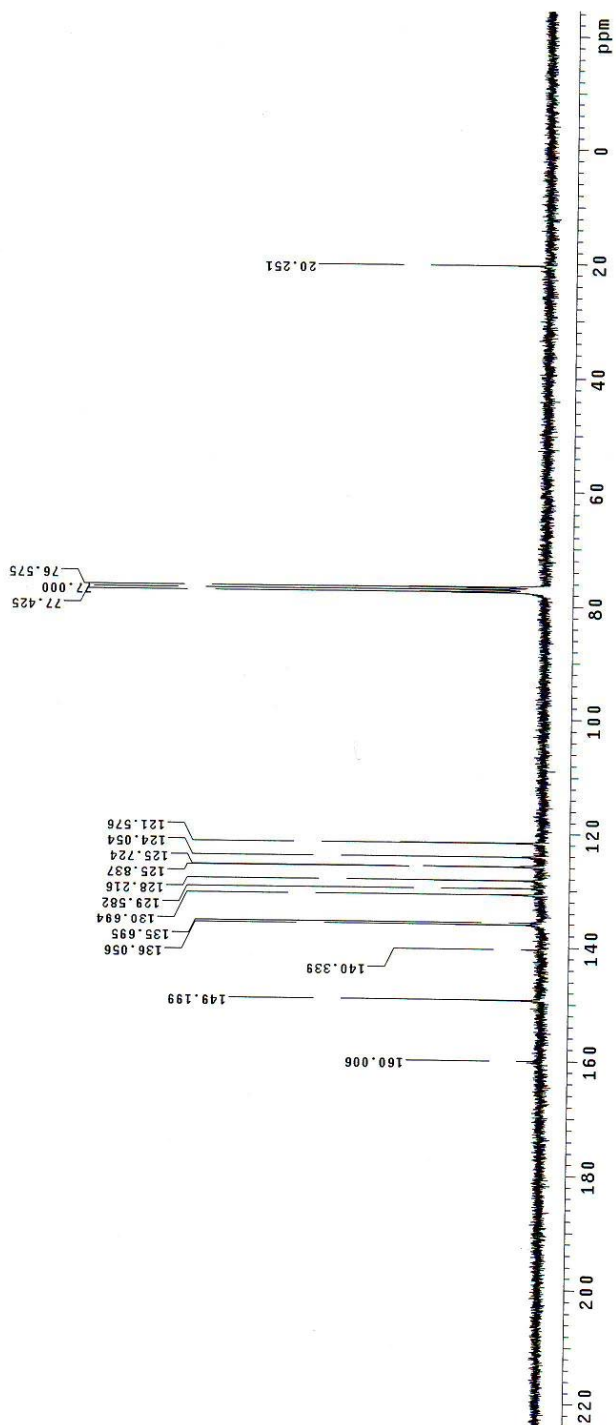

Supplement: Supplementary file 1 [file 4650907]
